# Supplementary material for: G4 accuracy at DFT cost: unlocking accurate redox potentials for organic molecules using systematic error cancellation
Source: Royal Society of Chemistry journal article supplement (doi:10.1039/c9cp06622e), 2020-01-01
Supplement: c9cp06622e1.xlsx [file c9cp06622e1.xlsx]

## Sheet: Sheet1
E° in water (V vs SHE)
											MAE for G4 vs Exp. in water (V vs SHE)							MAE of G4 and DFT with Improvement to DFT (vs Exp.) MAE by CBH-2 (V vs SHE)							Improvement to DFT (vs Exp.) MAE by CBH-2 (V vs SHE)
B3LYP
	EXP	G4	DFT	CBH	DFT-EXP	CBH-EXP	DFT-G4	CBH-G4				EXP	G4	G4-EXP	MAE (vs EXP)			Functional Group	G4 MAE	LL MAE	CBH-corrected MAE	LL MAE- CBH-corrected MAE			Functional Group	Functional	LL MAE- CBH-corrected MAE
(1) 2,6-dimethoxyphenol	0.664	0.633456	0.484755	0.600851	-0.179245	-0.06	-0.15	-0.03			(1) 2,6-dimethoxyphenol	0.664	0.633456	-0.0305436	MAE (phenols)=	0.0375849				B3LYP					Phenols	B3LYP	0.106316
(2) 2-methoxy-4-formylphenol	0.919	0.903291	0.794026	0.910122	-0.13	-0.01	-0.11	0.01			(2) 2-methoxy-4-formylphenol	0.919	0.903291	-0.0157093				phenols	0.04	0.143118	0.0368421	0.106276				B3LYP-D3BJ	0.0742105
(3) 2-methoxyphenol	0.794	0.853193	0.677356	0.793452	-0.11	0	-0.17	-0.06			(3) 2-methoxyphenol	0.794	0.853193	0.0591934				anilines	0.05	0.144286	0.0642857	0.08				CAM-B3LYP	0.121053
(4) 3-hydroxy-acetophenone	1.085	1.07149	0.934348	1.05044	-0.15	-0.03	-0.14	-0.02			(4) 3-hydroxy-acetophenone	1.085	1.07149	-0.0135119				amines	0.1	0.282	0.082	0.2				CAM-B3LYP-D3BJ	0.104737
(5) 3-methoxyphenol	0.999	1.05361	0.893726	1.00982	-0.11	0.01	-0.16	-0.04			(5) 3-methoxyphenol	0.999	1.05361	0.0546098				methoxybenzenes	0.07	0.252857	0.08	0.172857				ωB97X	0.0663158
(6) 4-ethyl-2-methoxyphenol	0.718	0.721215	0.569458	0.685554	-0.15	-0.03	-0.15	-0.03			(6) 4-ethyl-2-methoxyphenol	0.718	0.721215	0.00321511				amino acids	0.11	0.206	0.138	0.068				ωB97X-D	0.00368421
(7) 4-ethylphenol	0.92	0.923346	0.756491	0.872586	-0.16	-0.05	-0.16	-0.05			(7) 4-ethylphenol	0.92	0.923346	0.00334594						B3LYP-D3BJ						M06-2X	-0.0447368
(8) 4-hydroxy-acetophenone	1.139	1.09285	1.00215	1.11825	-0.14	-0.02	-0.09	0.03			(8) 4-hydroxy-acetophenone	1.139	1.09285	-0.0461504				phenols	0.04	0.11	0.0357895	0.0742105				M06-2X-D3	-0.0468421
(9) 4-methoxyphenol	0.76	0.76851	0.582032	0.698127	-0.18	-0.06	-0.19	-0.07			(9) 4-methoxyphenol	0.76	0.76851	0.00850959				anilines	0.05	0.145714	0.0628571	0.0828571			Anilines	B3LYP	0.08
(10) bisphenol-A	0.912	0.815341	0.743907	0.860002	-0.17	-0.05	-0.08	0.04			(10) bisphenol-A	0.912	0.815341	-0.0966585				amines	0.1	0.282	0.084	0.198				B3LYP-D3BJ	0.0828571
(11) triclosan	1.007	0.934204	0.830031	0.946126	-0.18	-0.06	-0.1	0.02			(11) triclosan	1.007	0.934204	-0.0727965				methoxybenzenes	0.07	0.241429	0.07	0.171429				CAM-B3LYP	0.0328571
(12) 3-chlorophenol	1.11	1.11573	0.94548	1.06158	-0.16	-0.05	-0.17	-0.06			(12) 3-chlorophenol	1.11	1.11573	0.00573486				amino acids	0.11	0.186	0.132	0.054				CAM-B3LYP-D3BJ	0.0342857
(13) 2,4,6-trichlorophenol	0.925	0.97845	0.786433	0.902529	-0.14	-0.03	-0.19	-0.08			(13) 2,4,6-trichlorophenol	0.925	0.97845	0.0534503						CAM-B3LYP						ωB97X	0.0214286
(14) 2,4-dinitrophenol	1.493	1.43248	1.44137	1.55746	-0.05	0.07	0.01	0.13			(14) 2,4-dinitrophenol	1.493	1.43248	-0.0605173				phenols	0.04	0.148947	0.0278947	0.121053				ωB97X-D	0.0328571
(15) 2,5-dimethylphenol	0.86	0.899427	0.742167	0.858262	-0.12	0	-0.16	-0.04			(15) 2,5-dimethylphenol	0.86	0.899427	0.0394266				anilines	0.05	0.1	0.0671429	0.0328571				M06-2X	-0.0142857
(16) 2-chlorophenol	1.046	1.01872	0.840872	0.956967	-0.21	-0.09	-0.18	-0.06			(16) 2-chlorophenol	1.046	1.01872	-0.027276				amines	0.1	0.22	0.088	0.132				M06-2X-D3	-0.0142857
(17) 2-phenylphenol	0.914	0.986124	0.779595	0.89569	-0.13	-0.01	-0.21	-0.09			(17) 2-phenylphenol	0.914	0.986124	0.072124				methoxybenzenes	0.07	0.167143	0.0442857	0.122857			Amines	B3LYP	0.2
(18) 4-nitrophenol	1.249	1.22992	1.15773	1.27382	-0.09	0.02	-0.07	0.04			(18) 4-nitrophenol	1.249	1.22992	-0.0190835				amino acids	0.11	0.21	0.106	0.104				B3LYP-D3BJ	0.198
(19) 4-cyanophenol	1.213	1.18074	1.04704	1.16314	-0.16	-0.05	-0.13	-0.02			(19) 4-cyanophenol	1.213	1.18074	-0.0322556						CAM-B3LYP-D3BJ						CAM-B3LYP	0.132
(20) 2-methoxy-5-nitroaniline	1.103	1.21857	1.0887	1.22166	-0.01	0.12	-0.13	0			(20) 2-methoxy-5-nitroaniline	1.103	1.21857	0.115568	MAE (anilines)=	0.0536149		phenols	0.04	0.132632	0.0278947	0.104737				CAM-B3LYP-D3BJ	0.132
(21) 2-methoxyaniline	0.894	0.887779	0.68175	0.814714	-0.21	-0.08	-0.21	-0.08			(21) 2-methoxyaniline	0.894	0.887779	-0.0062212				anilines	0.05	0.102857	0.0685714	0.0342857				ωB97X	0.082
(22) 3-methoxyaniline	1.023	1.07851	0.890496	1.02346	-0.13	0	-0.19	-0.06			(22) 3-methoxyaniline	1.023	1.07851	0.0555078				amines	0.1	0.22	0.088	0.132				ωB97X-D	0.134
(23) 4-methoxyaniline	0.766	0.735446	0.517036	0.65	-0.25	-0.12	-0.22	-0.09			(23) 4-methoxyaniline	0.766	0.735446	-0.030554				methoxybenzenes	0.07	0.16	0.0385714	0.121429				M06-2X	-0.014
(24) 2-chloroaniline	1.204	1.29484	1.1078	1.24076	-0.09	0.04	-0.18	-0.05			(24) 2-chloroaniline	1.204	1.29484	0.0908433				amino acids	0.11	0.192	0.106	0.086				M06-2X-D3	-0.014
(25) 4-chloroaniline	1.058	1.13342	0.944592	1.07756	-0.12	0.02	-0.19	-0.05			(25) 4-chloroaniline	1.058	1.13342	0.0754216						M06-2X					Methoxybenzenes	B3LYP	0.172857
(26) 4-methylaniline	0.927	0.928189	0.726992	0.859956	-0.2	-0.07	-0.2	-0.07			(26) 4-methylaniline	0.927	0.928189	0.00118864				phenols	0.04	0.0257895	0.0705263	-0.0447368				B3LYP-D3BJ	0.171429
(27) diethylamine	1.36	1.18738	0.991374	1.20272	-0.37	-0.16	-0.2	0.01			(27) diethylamine	1.36	1.18738	-0.172617	MAE (amines)=	0.0998136		anilines	0.05	0.0885714	0.102857	-0.0142857				CAM-B3LYP	0.122857
(28) piperidine	1.34	1.21391	1.02115	1.2325	-0.32	-0.11	-0.19	0.02			(28) piperidine	1.34	1.21391	-0.126085				amines	0.1	0.1	0.114	-0.014				CAM-B3LYP-D3BJ	0.121429
(29) pyrrolidine	1.26	1.15584	0.961551	1.1729	-0.3	-0.09	-0.2	0.01			(29) pyrrolidine	1.26	1.15584	-0.104156				methoxybenzenes	0.07	0.0442857	0.0828571	-0.0385714				ωB97X	0.115714
(30) diphenylamine	1	1.06825	0.79812	0.988661	-0.2	-0.01	-0.27	-0.08			(30) diphenylamine	1	1.06825	0.0682489				amino acids	0.11	0.104	0.09	0.014				ωB97X-D	0.137143
(31) n-methylaniline	0.95	0.922039	0.727075	0.913219	-0.22	-0.04	-0.19	-0.01			(31) n-methylaniline	0.95	0.922039	-0.0279613						M06-2X-D3						M06-2X	-0.0385714
(32) 1,2,3-trimethoxybenzene	1.42	1.41482	1.15706	1.36666	-0.26	-0.05	-0.25	-0.04			(32) 1,2,3-trimethoxybenzene	1.42	1.41482	-0.00517895	MAE (methoxybenzenes)=	0.0674887		phenols	0.04	0.0236842	0.0705263	-0.0468421				M06-2X-D3	-0.0385714
(33) 1,2,4-trimethoxybenzene	1.13	1.0627	0.848754	1.05835	-0.28	-0.07	-0.21	0			(33) 1,2,4-trimethoxybenzene	1.13	1.0627	-0.0673024				anilines	0.05	0.0885714	0.102857	-0.0142857			Amino acids	B3LYP	0.068
(34) 1,2-dimethoxybenzene	1.44	1.38742	1.162	1.37159	-0.28	-0.07	-0.23	-0.02			(34) 1,2-dimethoxybenzene	1.44	1.38742	-0.0525814				amines	0.1	0.1	0.114	-0.014				B3LYP-D3BJ	0.054
(35) 1,3-dimethoxybenzene	1.6	1.56378	1.34849	1.55809	-0.25	-0.04	-0.21	0			(35) 1,3-dimethoxybenzene	1.6	1.56378	-0.0362204				methoxybenzenes	0.07	0.0442857	0.0828571	-0.0385714				CAM-B3LYP	0.104
(36) 1,4-dimethoxybenzene	1.3	1.2103	1.00439	1.21399	-0.3	-0.09	-0.21	0			(36) 1,4-dimethoxybenzene	1.3	1.2103	-0.0897044				amino acids	0.11	0.104	0.088	0.016				CAM-B3LYP-D3BJ	0.086
(37) 3,2-methoxy-phenoxyl-1,2-propanediol	1.4	1.30755	1.08052	1.29012	-0.32	-0.11	-0.23	-0.02			(37) 3,2-methoxy-phenoxyl-1,2-propanediol	1.4	1.30755	-0.0924487						wB97X						ωB97X	0.074
(38) anisole	1.62	1.74898	1.53682	1.74642	-0.08	0.13	-0.21	0			(38) anisole	1.62	1.74898	0.128985				phenols	0.04	0.0963158	0.03	0.0663158				ωB97X-D	0.038
(39) 3-amino-L-tyrosine	0.64	0.452455	0.299176	0.415271	-0.34	-0.22	-0.15	-0.03			(39) 3-amino-L-tyrosine	0.64	0.452455	-0.187545	MAE (amino acids)=	0.108254		anilines	0.05	0.09	0.0685714	0.0214286				M06-2X	0.014
(40) 3-methoxy-L-tyrosine	0.87	0.664273	0.551566	0.667662	-0.32	-0.2	-0.11	0.01			(40) 3-methoxy-L-tyrosine	0.87	0.664273	-0.205727				amines	0.1	0.186	0.104	0.082				M06-2X-D3	0.016
(41) 3-nitro-L-tyrosine	1.04	1.04181	1.03942	1.15552	0	0.12	0	0.12			(41) 3-nitro-L-tyrosine	1.04	1.04181	0.00181272				methoxybenzenes	0.07	0.157143	0.0414286	0.115714
(42) 3-fluoro-L-tyrosine	0.9	0.840852	0.725655	0.841751	-0.17	-0.06	-0.11	0			(42) 3-fluoro-L-tyrosine	0.9	0.840852	-0.059148				amino acids	0.11	0.158	0.084	0.074
(43) L-tyrosine	0.94	0.852961	0.738289	0.854384	-0.2	-0.09	-0.11	0			(43) L-tyrosine	0.94	0.852961	-0.0870386						wB97X-D
MAE					0.184634	0.0653488	0.163256	0.0393023			MAE			0.0605157				phenols	0.04	0.0363158	0.0326316	0.00368421
											Comparison of G4 and experimental values. MAEs for each functional group given							anilines	0.05	0.104286	0.0714286	0.0328571
benzyl methyl sulfide	1.61	1.8371	1.57297	1.74106	-0.0370332	0.13106	-0.27	-0.1										amines	0.1	0.226	0.092	0.134
2-hydroxyethyl benzyl sulfide	1.56	1.80934	1.5795	1.76918	0.0194951	0.209181	-0.23	-0.04										methoxybenzenes	0.07	0.178571	0.0414286	0.137143
thioanisole	1.53	1.59643	1.32189	1.59491	-0.20811	0.0649126	-0.28	-0.01										amino acids	0.11	0.132	0.094	0.038
B3LYP-D3BJ											MAE (V vs SHE)		vs. EXP.		vs. G4
	EXP	G4	DFT	CBH	DFT-EXP	CBH-EXP	DFT-G4	CBH-G4					LL (DFT)	CBH-corrected DFT	LL (DFT)	CBH-corrected DFT
(1) 2,6-dimethoxyphenol	0.664	0.633456	0.520258	0.610469	-0.14	-0.05	-0.11	-0.02			B3LYP		0.184651	0.0653488	0.163256	0.0393023
(2) 2-methoxy-4-formylphenol	0.919	0.903291	0.828857	0.919068	-0.09	0	-0.07	0.02			B3LYP-D3BJ		0.166047	0.0625581	0.146512	0.0397674
(3) 2-methoxyphenol	0.794	0.853193	0.712151	0.802362	-0.08	0.01	-0.14	-0.05			CAM-B3LYP		0.159302	0.0530233	0.136977	0.0339535
(4) 3-hydroxy-acetophenone	1.085	1.07149	0.965423	1.05563	-0.11	-0.02	-0.1	-0.01			CAM-B3LYP-D3BJ		0.149302	0.0523256	0.127442	0.0351163
(5) 3-methoxyphenol	0.999	1.05361	0.922891	1.0131	-0.08	0.01	-0.13	-0.04			ωB97X		0.122791	0.0530233	0.10093	0.044186
(6) 4-ethyl-2-methoxyphenol	0.718	0.721215	0.602263	0.692474	-0.12	-0.03	-0.12	-0.03			ωB97X-D		0.103721	0.0544186	0.0893023	0.0418605
(7) 4-ethylphenol	0.92	0.923346	0.782417	0.872628	-0.14	-0.05	-0.14	-0.05			M06-2X		0.0567442	0.0851163	0.0386047	0.0786047
(8) 4-hydroxy-acetophenone	1.139	1.09285	1.03099	1.1212	-0.11	-0.02	-0.06	0.03			M06-2X-D3		0.055814	0.0848837	0.0381395	0.0788372
(9) 4-methoxyphenol	0.76	0.76851	0.610207	0.700418	-0.15	-0.06	-0.16	-0.07			MAE for 43 non-sulfur compounds in water
(10) bisphenol-A	0.912	0.815341	0.766331	0.856542	-0.14	-0.05	-0.05	0.04
(11) triclosan	1.007	0.934204	0.857073	0.947284	-0.15	-0.06	-0.07	0.02
(12) 3-chlorophenol	1.11	1.11573	0.974769	1.06498	-0.14	-0.05	-0.15	-0.06
(13) 2,4,6-trichlorophenol	0.925	0.97845	0.822805	0.913016	-0.11	-0.02	-0.16	-0.07
(14) 2,4-dinitrophenol	1.493	1.43248	1.48193	1.57214	-0.01	0.08	0.05	0.14
(15) 2,5-dimethylphenol	0.86	0.899427	0.779299	0.86951	-0.08	0.01	-0.12	-0.03
(16) 2-chlorophenol	1.046	1.01872	0.877666	0.967877	-0.17	-0.08	-0.14	-0.05
(17) 2-phenylphenol	0.914	0.986124	0.827028	0.917239	-0.08	0.01	-0.16	-0.07
(18) 4-nitrophenol	1.249	1.22992	1.18665	1.27686	-0.06	0.03	-0.04	0.05
(19) 4-cyanophenol	1.213	1.18074	1.07547	1.16568	-0.13	-0.04	-0.1	-0.01
(20) 2-methoxy-5-nitroaniline	1.103	1.21857	1.09008	1.22247	-0.01	0.12	-0.13	0
(21) 2-methoxyaniline	0.894	0.887779	0.682135	0.814526	-0.21	-0.08	-0.21	-0.08
(22) 3-methoxyaniline	1.023	1.07851	0.89217	1.02456	-0.13	0	-0.19	-0.06
(23) 4-methoxyaniline	0.766	0.735446	0.515971	0.648362	-0.25	-0.12	-0.22	-0.09
(24) 2-chloroaniline	1.204	1.29484	1.10752	1.23991	-0.09	0.04	-0.18	-0.05
(25) 4-chloroaniline	1.058	1.13342	0.941909	1.0743	-0.12	0.01	-0.19	-0.06
(26) 4-methylaniline	0.927	0.928189	0.72436	0.856751	-0.21	-0.07	-0.21	-0.07
(27) diethylamine	1.36	1.18738	0.99397	1.201	-0.37	-0.16	-0.2	0.01
(28) piperidine	1.34	1.21391	1.0247	1.23173	-0.32	-0.11	-0.19	0.02
(29) pyrrolidine	1.26	1.15584	0.96782	1.17485	-0.29	-0.09	-0.19	0.01
(30) diphenylamine	1	1.06825	0.79248	0.978975	-0.21	-0.02	-0.28	-0.09
(31) n-methylaniline	0.95	0.922039	0.727835	0.909805	-0.22	-0.04	-0.19	-0.01
(32) 1,2,3-trimethoxybenzene	1.42	1.41482	1.1609	1.36843	-0.26	-0.05	-0.25	-0.04
(33) 1,2,4-trimethoxybenzene	1.13	1.0627	0.848667	1.0562	-0.28	-0.07	-0.21	0
(34) 1,2-dimethoxybenzene	1.44	1.38742	1.16385	1.37138	-0.28	-0.07	-0.23	-0.02
(35) 1,3-dimethoxybenzene	1.6	1.56378	1.34944	1.55697	-0.25	-0.04	-0.21	0
(36) 1,4-dimethoxybenzene	1.3	1.2103	1.0043	1.21182	-0.3	-0.09	-0.21	0
(37) 3,2-methoxy-phenoxyl-1,2-propanediol	1.4	1.30755	1.15574	1.36327	-0.24	-0.04	-0.15	0.05
(38) anisole	1.62	1.74898	1.53808	1.74561	-0.08	0.13	-0.21	0
(39) 3-amino-L-tyrosine	0.64	0.452455	0.337272	0.427483	-0.3	-0.21	-0.11	-0.02
(40) 3-methoxy-L-tyrosine	0.87	0.664273	0.589673	0.679884	-0.28	-0.19	-0.07	0.02
(41) 3-nitro-L-tyrosine	1.04	1.04181	1.07692	1.16713	0.04	0.13	0.04	0.13
(42) 3-fluoro-L-tyrosine	0.9	0.840852	0.7575	0.847711	-0.14	-0.05	-0.08	0.01
(43) L-tyrosine	0.94	0.852961	0.771407	0.861618	-0.17	-0.08	-0.08	0.01
MAE					0.166047	0.0625581	0.146512	0.0397674
benzyl methyl sulfide	1.61	1.8371	1.52338	1.6927	-0.0866209	0.0827038	-0.32	-0.15
2-hydroxyethyl benzyl sulfide	1.56	1.80934	1.53791	1.72812	-0.0220873	0.168116	-0.27	-0.08
thioanisole	1.53	1.59643	1.31881	1.59416	-0.211192	0.064159	-0.28	-0.01
CAM-B3LYP
	EXP	G4	DFT	CBH	DFT-EXP	CBH-EXP	DFT-G4	CBH-G4
(1) 2,6-dimethoxyphenol	0.664	0.633456	0.492037	0.651712	-0.17	-0.01	-0.14	0.02
(2) 2-methoxy-4-formylphenol	0.919	0.903291	0.786014	0.945689	-0.13	0.03	-0.11	0.05
(3) 2-methoxyphenol	0.794	0.853193	0.679944	0.839619	-0.11	0.05	-0.17	-0.01
(4) 3-hydroxy-acetophenone	1.085	1.07149	0.911258	1.07093	-0.17	-0.01	-0.16	0
(5) 3-methoxyphenol	0.999	1.05361	0.894514	1.05419	-0.11	0.05	-0.16	0
(6) 4-ethyl-2-methoxyphenol	0.718	0.721215	0.574241	0.733916	-0.15	0.01	-0.15	0.01
(7) 4-ethylphenol	0.92	0.923346	0.746141	0.905816	-0.17	-0.01	-0.17	-0.01
(8) 4-hydroxy-acetophenone	1.139	1.09285	0.977999	1.13767	-0.16	0	-0.11	0.05
(9) 4-methoxyphenol	0.76	0.76851	0.584266	0.743942	-0.18	-0.02	-0.19	-0.03
(10) bisphenol-A	0.912	0.815341	0.741542	0.901217	-0.17	-0.01	-0.08	0.08
(11) triclosan	1.007	0.934204	0.839307	0.998982	-0.17	-0.01	-0.09	0.07
(12) 3-chlorophenol	1.11	1.11573	0.934382	1.09406	-0.18	-0.02	-0.19	-0.03
(13) 2,4,6-trichlorophenol	0.925	0.97845	0.799793	0.959468	-0.13	0.03	-0.18	-0.02
(14) 2,4-dinitrophenol	1.493	1.43248	1.41855	1.57822	-0.07	0.09	-0.01	0.15
(15) 2,5-dimethylphenol	0.86	0.899427	0.730666	0.890342	-0.13	0.03	-0.17	-0.01
(16) 2-chlorophenol	1.046	1.01872	0.833668	0.993343	-0.22	-0.06	-0.19	-0.03
(17) 2-phenylphenol	0.914	0.986124	0.78667	0.946345	-0.12	0.04	-0.2	-0.04
(18) 4-nitrophenol	1.249	1.22992	1.1276	1.28727	-0.12	0.04	-0.1	0.06
(19) 4-cyanophenol	1.213	1.18074	1.03557	1.19524	-0.17	-0.01	-0.14	0.02
(20) 2-methoxy-5-nitroaniline	1.103	1.21857	1.11137	1.23944	0.01	0.14	-0.11	0.02
(21) 2-methoxyaniline	0.894	0.887779	0.731863	0.859933	-0.16	-0.03	-0.16	-0.03
(22) 3-methoxyaniline	1.023	1.07851	0.952165	1.08023	-0.07	0.06	-0.13	0
(23) 4-methoxyaniline	0.766	0.735446	0.575071	0.703141	-0.19	-0.07	-0.16	-0.04
(24) 2-chloroaniline	1.204	1.29484	1.15273	1.2808	-0.05	0.08	-0.14	-0.01
(25) 4-chloroaniline	1.058	1.13342	0.995631	1.1237	-0.06	0.06	-0.13	-0.01
(26) 4-methylaniline	0.927	0.928189	0.767477	0.895547	-0.16	-0.03	-0.16	-0.03
(27) diethylamine	1.36	1.18738	1.02866	1.20494	-0.33	-0.16	-0.16	0.01
(28) piperidine	1.34	1.21391	1.09267	1.26895	-0.25	-0.07	-0.12	0.06
(29) pyrrolidine	1.26	1.15584	0.987221	1.16351	-0.27	-0.1	-0.17	0
(30) diphenylamine	1	1.06825	0.921011	1.10136	-0.08	0.1	-0.15	0.03
(31) n-methylaniline	0.95	0.922039	0.776006	0.944078	-0.17	-0.01	-0.14	0.02
(32) 1,2,3-trimethoxybenzene	1.42	1.41482	1.25661	1.42394	-0.16	0	-0.15	0.01
(33) 1,2,4-trimethoxybenzene	1.13	1.0627	0.935828	1.10316	-0.19	-0.03	-0.12	0.04
(34) 1,2-dimethoxybenzene	1.44	1.38742	1.23874	1.40607	-0.2	-0.03	-0.15	0.02
(35) 1,3-dimethoxybenzene	1.6	1.56378	1.43503	1.60235	-0.16	0	-0.12	0.04
(36) 1,4-dimethoxybenzene	1.3	1.2103	1.08015	1.24747	-0.22	-0.05	-0.13	0.04
(37) 3,2-methoxy-phenoxyl-1,2-propanediol	1.4	1.30755	1.18054	1.34786	-0.22	-0.05	-0.13	0.04
(38) anisole	1.62	1.74898	1.5978	1.76513	-0.02	0.15	-0.15	0.02
(39) 3-amino-L-tyrosine	0.64	0.452455	0.305444	0.46512	-0.33	-0.17	-0.14	0.02
(40) 3-methoxy-L-tyrosine	0.87	0.664273	0.558119	0.717795	-0.31	-0.15	-0.1	0.06
(41) 3-nitro-L-tyrosine	1.04	1.04181	1.02192	1.18159	-0.02	0.14	-0.02	0.14
(42) 3-fluoro-L-tyrosine	0.9	0.840852	0.722803	0.882478	-0.18	-0.02	-0.12	0.04
(43) L-tyrosine	0.94	0.852961	0.730371	0.890046	-0.21	-0.05	-0.12	0.04
MAE					0.159302	0.0530233	0.136977	0.0339535
benzyl methyl sulfide	1.61	1.8371	1.73774	1.87667	0.127739	0.266667	-0.1	0.04
2-hydroxyethyl benzyl sulfide	1.56	1.80934	1.74342	1.89138	0.183422	0.331383	-0.07	0.08
thioanisole	1.53	1.59643	1.41425	1.6243	-0.115745	0.0942953	-0.19	0.02
CAM-B3LYP-D3BJ
	EXP	G4	DFT	CBH	DFT-EXP	CBH-EXP	DFT-G4	CBH-G4
(1) 2,6-dimethoxyphenol	0.664	0.633456	0.509545	0.657632	-0.15	0	-0.12	0.03
(2) 2-methoxy-4-formylphenol	0.919	0.903291	0.802707	0.950793	-0.12	0.03	-0.1	0.05
(3) 2-methoxyphenol	0.794	0.853193	0.69663	0.844717	-0.09	0.05	-0.15	-0.01
(4) 3-hydroxy-acetophenone	1.085	1.07149	0.926095	1.07418	-0.15	-0.01	-0.14	0
(5) 3-methoxyphenol	0.999	1.05361	0.907981	1.05607	-0.09	0.06	-0.14	0.01
(6) 4-ethyl-2-methoxyphenol	0.718	0.721215	0.590377	0.738463	-0.13	0.02	-0.13	0.02
(7) 4-ethylphenol	0.92	0.923346	0.758005	0.906091	-0.16	-0.01	-0.16	-0.01
(8) 4-hydroxy-acetophenone	1.139	1.09285	0.991156	1.13924	-0.15	0	-0.1	0.05
(9) 4-methoxyphenol	0.76	0.76851	0.597095	0.745181	-0.16	-0.01	-0.17	-0.02
(10) bisphenol-A	0.912	0.815341	0.751353	0.899439	-0.16	-0.01	-0.07	0.08
(11) triclosan	1.007	0.934204	0.85188	0.999967	-0.16	-0.01	-0.08	0.07
(12) 3-chlorophenol	1.11	1.11573	0.947869	1.09596	-0.16	-0.01	-0.17	-0.02
(13) 2,4,6-trichlorophenol	0.925	0.97845	0.816894	0.96498	-0.11	0.03	-0.16	-0.02
(14) 2,4-dinitrophenol	1.493	1.43248	1.43639	1.58447	-0.05	0.09	0.01	0.15
(15) 2,5-dimethylphenol	0.86	0.899427	0.747667	0.895754	-0.11	0.04	-0.15	0
(16) 2-chlorophenol	1.046	1.01872	0.850146	0.998232	-0.2	-0.05	-0.17	-0.02
(17) 2-phenylphenol	0.914	0.986124	0.810726	0.958813	-0.1	0.05	-0.18	-0.03
(18) 4-nitrophenol	1.249	1.22992	1.1408	1.28889	-0.11	0.04	-0.09	0.06
(19) 4-cyanophenol	1.213	1.18074	1.04852	1.1966	-0.16	-0.01	-0.13	0.02
(20) 2-methoxy-5-nitroaniline	1.103	1.21857	1.11186	1.2397	0.01	0.14	-0.11	0.02
(21) 2-methoxyaniline	0.894	0.887779	0.731864	0.859712	-0.16	-0.03	-0.16	-0.03
(22) 3-methoxyaniline	1.023	1.07851	0.953371	1.08122	-0.07	0.06	-0.13	0
(23) 4-methoxyaniline	0.766	0.735446	0.574276	0.702124	-0.2	-0.07	-0.17	-0.04
(24) 2-chloroaniline	1.204	1.29484	1.1525	1.28035	-0.05	0.08	-0.14	-0.01
(25) 4-chloroaniline	1.058	1.13342	0.994202	1.12205	-0.07	0.06	-0.14	-0.01
(26) 4-methylaniline	0.927	0.928189	0.766117	0.893966	-0.16	-0.04	-0.16	-0.04
(27) diethylamine	1.36	1.18738	1.02897	1.20417	-0.33	-0.16	-0.16	0.01
(28) piperidine	1.34	1.21391	1.09379	1.269	-0.25	-0.07	-0.12	0.06
(29) pyrrolidine	1.26	1.15584	0.989346	1.16455	-0.27	-0.1	-0.17	0
(30) diphenylamine	1	1.06825	0.918061	1.0972	-0.08	0.1	-0.15	0.03
(31) n-methylaniline	0.95	0.922039	0.776141	0.943088	-0.17	-0.01	-0.14	0.02
(32) 1,2,3-trimethoxybenzene	1.42	1.41482	1.25996	1.42685	-0.16	0.01	-0.15	0.02
(33) 1,2,4-trimethoxybenzene	1.13	1.0627	0.935373	1.10227	-0.19	-0.03	-0.12	0.04
(34) 1,2-dimethoxybenzene	1.44	1.38742	1.23917	1.40607	-0.2	-0.03	-0.15	0.02
(35) 1,3-dimethoxybenzene	1.6	1.56378	1.43513	1.60203	-0.16	0	-0.12	0.04
(36) 1,4-dimethoxybenzene	1.3	1.2103	1.07965	1.24655	-0.22	-0.05	-0.13	0.04
(37) 3,2-methoxy-phenoxyl-1,2-propanediol	1.4	1.30755	1.22574	1.39263	-0.17	-0.01	-0.08	0.08
(38) anisole	1.62	1.74898	1.59797	1.76487	-0.02	0.14	-0.15	0.01
(39) 3-amino-L-tyrosine	0.64	0.452455	0.32353	0.471616	-0.32	-0.17	-0.13	0.02
(40) 3-methoxy-L-tyrosine	0.87	0.664273	0.576115	0.724201	-0.29	-0.15	-0.08	0.06
(41) 3-nitro-L-tyrosine	1.04	1.04181	1.03787	1.18596	0	0.15	0	0.15
(42) 3-fluoro-L-tyrosine	0.9	0.840852	0.73724	0.885326	-0.16	-0.01	-0.1	0.05
(43) L-tyrosine	0.94	0.852961	0.745467	0.893553	-0.19	-0.05	-0.1	0.04
MAE					0.149302	0.0523256	0.127442	0.0351163
benzyl methyl sulfide	1.61	1.8371	1.7099	1.84913	0.0999024	0.239128	-0.13	0.01
2-hydroxyethyl benzyl sulfide	1.56	1.80934	1.71717	1.8653	0.157172	0.305301	-0.09	0.06
thioanisole	1.53	1.59643	1.41271	1.62332	-0.117289	0.0933226	-0.19	0.02
					0.124788	0.212584	0.136667	0.03
M06-2X
	EXP	G4	DFT	CBH	DFT-EXP	CBH-EXP	DFT-G4	CBH-G4
(1) 2,6-dimethoxyphenol	0.664	0.633456	0.623312	0.692294	-0.04	0.03	-0.01	0.06
(2) 2-methoxy-4-formylphenol	0.919	0.903291	0.912657	0.981638	-0.01	0.06	0.01	0.08
(3) 2-methoxyphenol	0.794	0.853193	0.818522	0.887503	0.03	0.1	-0.03	0.04
(4) 3-hydroxy-acetophenone	1.085	1.07149	1.07254	1.14153	-0.01	0.06	0	0.07
(5) 3-methoxyphenol	0.999	1.05361	1.06961	1.13859	0.07	0.14	0.02	0.09
(6) 4-ethyl-2-methoxyphenol	0.718	0.721215	0.71299	0.781971	-0.01	0.06	-0.01	0.06
(7) 4-ethylphenol	0.92	0.923346	0.904408	0.97339	-0.02	0.05	-0.02	0.05
(8) 4-hydroxy-acetophenone	1.139	1.09285	1.14089	1.20987	0	0.07	0.05	0.12
(9) 4-methoxyphenol	0.76	0.76851	0.72801	0.796991	-0.03	0.04	-0.04	0.03
(10) bisphenol-A	0.912	0.815341	0.905073	0.974054	0	0.06	0.09	0.15
(11) triclosan	1.007	0.934204	0.982406	1.05139	-0.03	0.04	0.05	0.12
(12) 3-chlorophenol	1.11	1.11573	1.10141	1.17039	-0.01	0.06	-0.02	0.05
(13) 2,4,6-trichlorophenol	0.925	0.97845	0.933706	1.00269	0	0.07	-0.05	0.02
(14) 2,4-dinitrophenol	1.493	1.43248	1.5305	1.59949	0.04	0.11	0.1	0.17
(15) 2,5-dimethylphenol	0.86	0.899427	0.897316	0.966298	0.04	0.11	0	0.07
(16) 2-chlorophenol	1.046	1.01872	0.984327	1.05331	-0.07	0	-0.04	0.03
(17) 2-phenylphenol	0.914	0.986124	0.946835	1.01582	0.04	0.11	-0.04	0.03
(18) 4-nitrophenol	1.249	1.22992	1.29035	1.35934	0.04	0.11	0.06	0.13
(19) 4-cyanophenol	1.213	1.18074	1.20542	1.27441	0	0.06	0.03	0.09
(20) 2-methoxy-5-nitroaniline	1.103	1.21857	1.28026	1.30315	0.18	0.2	0.06	0.08
(21) 2-methoxyaniline	0.894	0.887779	0.906622	0.929506	0.02	0.04	0.02	0.04
(22) 3-methoxyaniline	1.023	1.07851	1.14994	1.17282	0.13	0.15	0.07	0.09
(23) 4-methoxyaniline	0.766	0.735446	0.738544	0.761427	-0.03	-0.01	0	0.02
(24) 2-chloroaniline	1.204	1.29484	1.32738	1.35027	0.13	0.15	0.04	0.06
(25) 4-chloroaniline	1.058	1.13342	1.16801	1.1909	0.11	0.13	0.04	0.06
(26) 4-methylaniline	0.927	0.928189	0.946178	0.969061	0.02	0.04	0.02	0.04
(27) diethylamine	1.36	1.18738	1.1968	1.20301	-0.16	-0.16	0.01	0.01
(28) piperidine	1.34	1.21391	1.2257	1.23192	-0.11	-0.11	0.02	0.02
(29) pyrrolidine	1.26	1.15584	1.15167	1.15789	-0.11	-0.1	-0.01	0
(30) diphenylamine	1	1.06825	1.11165	1.15732	0.11	0.16	0.04	0.09
(31) n-methylaniline	0.95	0.922039	0.964847	0.990088	0.01	0.04	0.04	0.07
(32) 1,2,3-trimethoxybenzene	1.42	1.41482	1.45212	1.51056	0.03	0.09	0.04	0.1
(33) 1,2,4-trimethoxybenzene	1.13	1.0627	1.12726	1.1857	0	0.06	0.07	0.13
(34) 1,2-dimethoxybenzene	1.44	1.38742	1.42574	1.48418	-0.01	0.04	0.04	0.09
(35) 1,3-dimethoxybenzene	1.6	1.56378	1.64877	1.70721	0.05	0.11	0.09	0.15
(36) 1,4-dimethoxybenzene	1.3	1.2103	1.25484	1.31328	-0.05	0.01	0.04	0.1
(37) 3,2-methoxy-phenoxyl-1,2-propanediol	1.4	1.30755	1.38703	1.44547	-0.01	0.05	0.08	0.14
(38) anisole	1.62	1.74898	1.77751	1.83595	0.16	0.22	0.03	0.09
(39) 3-amino-L-tyrosine	0.64	0.452455	0.443407	0.512389	-0.2	-0.13	-0.01	0.06
(40) 3-methoxy-L-tyrosine	0.87	0.664273	0.705334	0.774316	-0.16	-0.1	0.05	0.11
(41) 3-nitro-L-tyrosine	1.04	1.04181	1.12553	1.19451	0.09	0.15	0.09	0.15
(42) 3-fluoro-L-tyrosine	0.9	0.840852	0.871813	0.940795	-0.03	0.04	0.03	0.1
(43) L-tyrosine	0.94	0.852961	0.900771	0.969753	-0.04	0.03	0.05	0.12
MAE					0.0567442	0.0851163	0.0386047	0.0786047
benzyl methyl sulfide	1.61	1.8371	1.8299	1.85796	0.219901	0.247955	-0.01	0.02
2-hydroxyethyl benzyl sulfide	1.56	1.80934	1.84554	1.86859	0.285542	0.30859	0.04	0.06
thioanisole	1.53	1.59643	1.57411	1.6641	0.0441138	0.134103	-0.03	0.06
								-
M06-2X-D3
	EXP	G4	DFT	CBH	DFT-EXP	CBH-EXP	DFT-G4	CBH-G4
(1) 2,6-dimethoxyphenol	0.664	0.633456	0.625328	0.693625	-0.03	0.03	0	0.06
(2) 2-methoxy-4-formylphenol	0.919	0.903291	0.914315	0.982612	-0.01	0.06	0.01	0.08
(3) 2-methoxyphenol	0.794	0.853193	0.820114	0.888411	0.03	0.1	-0.03	0.04
(4) 3-hydroxy-acetophenone	1.085	1.07149	1.07429	1.14259	-0.01	0.06	0	0.07
(5) 3-methoxyphenol	0.999	1.05361	1.07089	1.13919	0.07	0.14	0.02	0.09
(6) 4-ethyl-2-methoxyphenol	0.718	0.721215	0.714958	0.783255	-0.01	0.06	-0.01	0.06
(7) 4-ethylphenol	0.92	0.923346	0.905579	0.973876	-0.01	0.05	-0.01	0.05
(8) 4-hydroxy-acetophenone	1.139	1.09285	1.14204	1.21033	0	0.07	0.05	0.12
(9) 4-methoxyphenol	0.76	0.76851	0.729111	0.797407	-0.03	0.04	-0.04	0.03
(10) bisphenol-A	0.912	0.815341	0.906305	0.974602	0	0.06	0.09	0.15
(11) triclosan	1.007	0.934204	0.985891	1.05419	-0.02	0.04	0.06	0.12
(12) 3-chlorophenol	1.11	1.11573	1.10258	1.17087	-0.01	0.06	-0.02	0.05
(13) 2,4,6-trichlorophenol	0.925	0.97845	0.934982	1.00328	0	0.07	-0.05	0.02
(14) 2,4-dinitrophenol	1.493	1.43248	1.53196	1.60025	0.04	0.11	0.1	0.17
(15) 2,5-dimethylphenol	0.86	0.899427	0.898562	0.966859	0.04	0.11	0	0.07
(16) 2-chlorophenol	1.046	1.01872	0.985379	1.05368	-0.06	0	-0.03	0.03
(17) 2-phenylphenol	0.914	0.986124	0.949009	1.01731	0.04	0.11	-0.04	0.03
(18) 4-nitrophenol	1.249	1.22992	1.29147	1.35977	0.04	0.11	0.06	0.13
(19) 4-cyanophenol	1.213	1.18074	1.20655	1.27484	0	0.06	0.03	0.09
(20) 2-methoxy-5-nitroaniline	1.103	1.21857	1.28025	1.30316	0.18	0.2	0.06	0.08
(21) 2-methoxyaniline	0.894	0.887779	0.90661	0.929523	0.02	0.04	0.02	0.04
(22) 3-methoxyaniline	1.023	1.07851	1.15066	1.17357	0.13	0.15	0.07	0.09
(23) 4-methoxyaniline	0.766	0.735446	0.738466	0.761379	-0.03	-0.01	0	0.02
(24) 2-chloroaniline	1.204	1.29484	1.32733	1.35025	0.13	0.15	0.04	0.06
(25) 4-chloroaniline	1.058	1.13342	1.16797	1.19089	0.11	0.13	0.04	0.06
(26) 4-methylaniline	0.927	0.928189	0.946133	0.969046	0.02	0.04	0.02	0.04
(27) diethylamine	1.36	1.18738	1.19667	1.20306	-0.16	-0.16	0.01	0.01
(28) piperidine	1.34	1.21391	1.2256	1.232	-0.11	-0.11	0.02	0.02
(29) pyrrolidine	1.26	1.15584	1.1513	1.15769	-0.11	-0.1	-0.01	0
(30) diphenylamine	1	1.06825	1.11157	1.15742	0.11	0.16	0.04	0.09
(31) n-methylaniline	0.95	0.922039	0.964803	0.990223	0.01	0.04	0.04	0.07
(32) 1,2,3-trimethoxybenzene	1.42	1.41482	1.45289	1.51137	0.03	0.09	0.04	0.1
(33) 1,2,4-trimethoxybenzene	1.13	1.0627	1.12715	1.18563	0	0.06	0.07	0.13
(34) 1,2-dimethoxybenzene	1.44	1.38742	1.42562	1.4841	-0.01	0.04	0.04	0.09
(35) 1,3-dimethoxybenzene	1.6	1.56378	1.64876	1.70724	0.05	0.11	0.09	0.15
(36) 1,4-dimethoxybenzene	1.3	1.2103	1.25475	1.31323	-0.05	0.01	0.04	0.1
(37) 3,2-methoxy-phenoxyl-1,2-propanediol	1.4	1.30755	1.39126	1.44974	-0.01	0.05	0.08	0.14
(38) anisole	1.62	1.74898	1.77744	1.83592	0.16	0.22	0.03	0.09
(39) 3-amino-L-tyrosine	0.64	0.452455	0.444881	0.513178	-0.2	-0.13	-0.01	0.06
(40) 3-methoxy-L-tyrosine	0.87	0.664273	0.706895	0.775191	-0.16	-0.09	0.05	0.12
(41) 3-nitro-L-tyrosine	1.04	1.04181	1.12656	1.19486	0.09	0.15	0.09	0.15
(42) 3-fluoro-L-tyrosine	0.9	0.840852	0.873006	0.941303	-0.03	0.04	0.03	0.1
(43) L-tyrosine	0.94	0.852961	0.901947	0.970243	-0.04	0.03	0.05	0.12
MAE					0.055814	0.0848837	0.0381395	0.0788372
benzyl methyl sulfide	1.61	1.8371	1.82871	1.85674	0.218711	0.246741	-0.01	0.02
2-hydroxyethyl benzyl sulfide	1.56	1.80934	1.84334	1.86638	0.283343	0.306385	0.03	0.06
thioanisole	1.53	1.59643	1.57411	1.66405	0.0441111	0.134049	-0.03	0.06
wB97X
	EXP	G4	DFT	CBH	DFT-EXP	CBH-EXP	DFT-G4	CBH-G4
(1) 2,6-dimethoxyphenol	0.664	0.633456	0.543312	0.666377	-0.12	0.01	-0.09	0.04
(2) 2-methoxy-4-formylphenol	0.919	0.903291	0.829256	0.95232	-0.09	0.03	-0.07	0.05
(3) 2-methoxyphenol	0.794	0.853193	0.731575	0.854639	-0.06	0.06	-0.12	0
(4) 3-hydroxy-acetophenone	1.085	1.07149	0.962425	1.08549	-0.12	0.01	-0.11	0.02
(5) 3-methoxyphenol	0.999	1.05361	0.960413	1.08348	-0.04	0.08	-0.09	0.03
(6) 4-ethyl-2-methoxyphenol	0.718	0.721215	0.629295	0.752359	-0.09	0.03	-0.09	0.03
(7) 4-ethylphenol	0.92	0.923346	0.805614	0.928678	-0.11	0.01	-0.11	0.01
(8) 4-hydroxy-acetophenone	1.139	1.09285	1.02841	1.15148	-0.11	0.01	-0.06	0.06
(9) 4-methoxyphenol	0.76	0.76851	0.646729	0.769793	-0.11	0.01	-0.12	0
(10) bisphenol-A	0.912	0.815341	0.805604	0.928669	-0.1	0.02	-0.01	0.11
(11) triclosan	1.007	0.934204	0.897678	1.02074	-0.11	0.01	-0.03	0.09
(12) 3-chlorophenol	1.11	1.11573	0.991221	1.11429	-0.12	0	-0.13	-0.01
(13) 2,4,6-trichlorophenol	0.925	0.97845	0.852031	0.975096	-0.08	0.05	-0.13	0
(14) 2,4-dinitrophenol	1.493	1.43248	1.42152	1.54458	-0.07	0.05	-0.01	0.11
(15) 2,5-dimethylphenol	0.86	0.899427	0.787017	0.910082	-0.07	0.05	-0.11	0.01
(16) 2-chlorophenol	1.046	1.01872	0.884416	1.00748	-0.17	-0.04	-0.14	-0.01
(17) 2-phenylphenol	0.914	0.986124	0.847269	0.970334	-0.06	0.06	-0.14	-0.02
(18) 4-nitrophenol	1.249	1.22992	1.16544	1.28851	-0.08	0.04	-0.06	0.06
(19) 4-cyanophenol	1.213	1.18074	1.09128	1.21435	-0.12	0	-0.09	0.03
(20) 2-methoxy-5-nitroaniline	1.103	1.21857	1.09702	1.24889	0	0.15	-0.12	0.03
(21) 2-methoxyaniline	0.894	0.887779	0.7425	0.89437	-0.15	0	-0.15	0
(22) 3-methoxyaniline	1.023	1.07851	0.970146	1.12202	-0.05	0.1	-0.11	0.04
(23) 4-methoxyaniline	0.766	0.735446	0.591614	0.743484	-0.18	-0.03	-0.15	0
(24) 2-chloroaniline	1.204	1.29484	1.15709	1.30896	-0.04	0.11	-0.13	0.02
(25) 4-chloroaniline	1.058	1.13342	1.00309	1.15496	-0.06	0.09	-0.13	0.02
(26) 4-methylaniline	0.927	0.928189	0.778438	0.930308	-0.15	0	-0.15	0
(27) diethylamine	1.36	1.18738	1.05998	1.21124	-0.3	-0.15	-0.13	0.02
(28) piperidine	1.34	1.21391	1.12394	1.27519	-0.22	-0.06	-0.09	0.07
(29) pyrrolidine	1.26	1.15584	1.00752	1.15878	-0.25	-0.1	-0.15	0
(30) diphenylamine	1	1.06825	0.987159	1.1915	-0.01	0.19	-0.08	0.12
(31) n-methylaniline	0.95	0.922039	0.796337	0.970395	-0.15	0.02	-0.12	0.05
(32) 1,2,3-trimethoxybenzene	1.42	1.41482	1.27357	1.46718	-0.15	0.05	-0.14	0.06
(33) 1,2,4-trimethoxybenzene	1.13	1.0627	0.950848	1.14445	-0.18	0.01	-0.11	0.08
(34) 1,2-dimethoxybenzene	1.44	1.38742	1.2476	1.4412	-0.19	0	-0.14	0.05
(35) 1,3-dimethoxybenzene	1.6	1.56378	1.44503	1.63863	-0.15	0.04	-0.11	0.08
(36) 1,4-dimethoxybenzene	1.3	1.2103	1.08952	1.28313	-0.21	-0.02	-0.12	0.07
(37) 3,2-methoxy-phenoxyl-1,2-propanediol	1.4	1.30755	1.2023	1.3959	-0.2	0	-0.11	0.09
(38) anisole	1.62	1.74898	1.59633	1.78994	-0.02	0.17	-0.15	0.04
(39) 3-amino-L-tyrosine	0.64	0.452455	0.380674	0.503738	-0.26	-0.14	-0.07	0.05
(40) 3-methoxy-L-tyrosine	0.87	0.664273	0.613834	0.736899	-0.26	-0.13	-0.05	0.08
(41) 3-nitro-L-tyrosine	1.04	1.04181	1.03545	1.15852	0	0.12	0	0.12
(42) 3-fluoro-L-tyrosine	0.9	0.840852	0.777816	0.900881	-0.12	0	-0.06	0.06
(43) L-tyrosine	0.94	0.852961	0.791141	0.914205	-0.15	-0.03	-0.06	0.06
MAE					0.122791	0.0530233	0.10093	0.044186
benzyl methyl sulfide	1.61	1.8371	1.79811	1.92945	0.188109	0.319454	-0.04	0.09
2-hydroxyethyl benzyl sulfide	1.56	1.80934	1.80723	1.93491	0.247232	0.374908	0	0.12
thioanisole	1.53	1.59643	1.45579	1.66509	-0.0742112	0.135087	-0.14	0.07
wB97X-D
	EXP	G4	DFT	CBH	DFT-EXP	CBH-EXP	DFT-G4	CBH-G4
(1) 2,6-dimethoxyphenol	0.664	0.633456	0.590351	0.648666	-0.07	-0.01	-0.04	0.02
(2) 2-methoxy-4-formylphenol	0.919	0.903291	0.893108	0.951423	-0.03	0.03	-0.01	0.05
(3) 2-methoxyphenol	0.794	0.853193	0.783953	0.842268	-0.01	0.05	-0.07	-0.01
(4) 3-hydroxy-acetophenone	1.085	1.07149	1.03678	1.0951	-0.04	0.02	-0.03	0.03
(5) 3-methoxyphenol	0.999	1.05361	1.01819	1.07651	0.02	0.08	-0.03	0.03
(6) 4-ethyl-2-methoxyphenol	0.718	0.721215	0.680108	0.738422	-0.04	0.02	-0.04	0.02
(7) 4-ethylphenol	0.92	0.923346	0.869262	0.927576	-0.05	0.01	-0.05	0.01
(8) 4-hydroxy-acetophenone	1.139	1.09285	1.10503	1.16335	-0.03	0.02	0.02	0.07
(9) 4-methoxyphenol	0.76	0.76851	0.701614	0.759928	-0.06	0	-0.07	-0.01
(10) bisphenol-A	0.912	0.815341	0.866721	0.925036	-0.04	0.02	0.05	0.11
(11) triclosan	1.007	0.934204	0.956711	1.01503	-0.05	0.01	0.03	0.09
(12) 3-chlorophenol	1.11	1.11573	1.05805	1.11637	-0.05	0.01	-0.06	0
(13) 2,4,6-trichlorophenol	0.925	0.97845	0.907344	0.965659	-0.02	0.04	-0.07	-0.01
(14) 2,4-dinitrophenol	1.493	1.43248	1.50638	1.56469	0.02	0.07	0.08	0.13
(15) 2,5-dimethylphenol	0.86	0.899427	0.858483	0.916797	0	0.06	-0.04	0.02
(16) 2-chlorophenol	1.046	1.01872	0.946744	1.00506	-0.1	-0.04	-0.07	-0.01
(17) 2-phenylphenol	0.914	0.986124	0.924089	0.982403	0.01	0.07	-0.07	-0.01
(18) 4-nitrophenol	1.249	1.22992	1.24656	1.30487	0	0.05	0.02	0.07
(19) 4-cyanophenol	1.213	1.18074	1.16298	1.2213	-0.05	0.01	-0.02	0.04
(20) 2-methoxy-5-nitroaniline	1.103	1.21857	1.09189	1.24526	-0.01	0.15	-0.13	0.03
(21) 2-methoxyaniline	0.894	0.887779	0.720791	0.874164	-0.17	-0.02	-0.17	-0.02
(22) 3-methoxyaniline	1.023	1.07851	0.949956	1.10333	-0.07	0.08	-0.13	0.02
(23) 4-methoxyaniline	0.766	0.735446	0.569974	0.723347	-0.2	-0.05	-0.17	-0.02
(24) 2-chloroaniline	1.204	1.29484	1.14646	1.29983	-0.05	0.1	-0.14	0.01
(25) 4-chloroaniline	1.058	1.13342	0.992327	1.1457	-0.07	0.09	-0.14	0.02
(26) 4-methylaniline	0.927	0.928189	0.768514	0.921888	-0.16	-0.01	-0.16	-0.01
(27) diethylamine	1.36	1.18738	1.01524	1.20775	-0.34	-0.15	-0.17	0.02
(28) piperidine	1.34	1.21391	1.06802	1.26053	-0.27	-0.08	-0.14	0.05
(29) pyrrolidine	1.26	1.15584	0.973639	1.16615	-0.29	-0.09	-0.19	0.01
(30) diphenylamine	1	1.06825	0.938689	1.13192	-0.06	0.13	-0.13	0.06
(31) n-methylaniline	0.95	0.922039	0.779261	0.964016	-0.17	0.01	-0.14	0.04
(32) 1,2,3-trimethoxybenzene	1.42	1.41482	1.24114	1.44521	-0.18	0.03	-0.17	0.04
(33) 1,2,4-trimethoxybenzene	1.13	1.0627	0.918991	1.12305	-0.21	-0.01	-0.14	0.06
(34) 1,2-dimethoxybenzene	1.44	1.38742	1.22161	1.42567	-0.22	-0.01	-0.17	0.04
(35) 1,3-dimethoxybenzene	1.6	1.56378	1.42437	1.62844	-0.18	0.03	-0.14	0.07
(36) 1,4-dimethoxybenzene	1.3	1.2103	1.06862	1.27268	-0.23	-0.03	-0.14	0.06
(37) 3,2-methoxy-phenoxyl-1,2-propanediol	1.4	1.30755	1.20126	1.40532	-0.2	0.01	-0.11	0.1
(38) anisole	1.62	1.74898	1.58849	1.79255	-0.03	0.17	-0.16	0.04
(39) 3-amino-L-tyrosine	0.64	0.452455	0.419797	0.478112	-0.22	-0.16	-0.03	0.03
(40) 3-methoxy-L-tyrosine	0.87	0.664273	0.664253	0.722568	-0.21	-0.15	0	0.06
(41) 3-nitro-L-tyrosine	1.04	1.04181	1.11556	1.17387	0.08	0.13	0.08	0.13
(42) 3-fluoro-L-tyrosine	0.9	0.840852	0.832697	0.891012	-0.07	-0.01	-0.01	0.05
(43) L-tyrosine	0.94	0.852961	0.856866	0.915181	-0.08	-0.02	0.01	0.07
MAE					0.103721	0.0544186	0.0893023	0.0418605
benzyl methyl sulfide	1.61	1.8371	1.70426	1.8432	0.094257	0.233197	-0.14	0
2-hydroxyethyl benzyl sulfide	1.56	1.80934	1.71416	1.86039	0.154162	0.300387	-0.1	0.05
thioanisole	1.53	1.59643	1.42166	1.66191	-0.108336	0.131907	-0.18	0.06
E° in acetonitrile for sulfur compounds (V vs SHE)
	EXP	G4	DFT	CBH	DFT-EXP	CBH-EXP	DFT-G4	CBH-G4
B3LYP
benzyl methyl sulfide	1.86	1.88	1.61073	1.77866	-0.249269	-0.0813437	-0.269269	-0.101344
2-hydroxyethyl benzyl sulfide	1.98	1.84	1.6091	1.79854	-0.370905	-0.181462	-0.230905	-0.0414624
thioanisole	1.64	1.63	1.3512	1.62452	-0.288804	-0.0154842	-0.278804	-0.00548422
B3LYP-D3BJ
benzyl methyl sulfide	1.86	1.88	1.56337	1.73255	-0.296626	-0.127447	-0.316626	-0.147447
2-hydroxyethyl benzyl sulfide	1.98	1.84	1.56838	1.75837	-0.411621	-0.221625	-0.271621	-0.0816253
thioanisole	1.64	1.63	1.34819	1.62388	-0.291812	-0.0161215	-0.281812	-0.00612149
CAM-B3LYP
benzyl methyl sulfide	1.86	1.88	1.77786	1.91665	-0.0821386	0.056651	-0.102139	0.036651
2-hydroxyethyl benzyl sulfide	1.98	1.84	1.77126	1.919	-0.208742	-0.0610034	-0.0687416	0.0789966
thioanisole	1.64	1.63	1.44365	1.65399	-0.196349	0.0139875	-0.186349	0.0239875
CAM-B3LYP-D3BJ
benzyl methyl sulfide	1.86	1.88	1.75101	1.89011	-0.108988	0.0301055	-0.128988	0.0101055
2-hydroxyethyl benzyl sulfide	1.98	1.84	1.74562	1.89354	-0.23438	-0.0864638	-0.0943801	0.0535362
thioanisole	1.64	1.63	1.44213	1.65305	-0.197867	0.013049	-0.187867	0.023049
M06-2X
benzyl methyl sulfide	1.86	1.88	1.87201	1.90038	0.0120134	0.0403763	-0.00798658	0.0203763
2-hydroxyethyl benzyl sulfide	1.98	1.84	1.87223	1.89568	-0.107771	-0.0843167	0.0322292	0.0556833
thioanisole	1.64	1.63	1.60291	1.69358	-0.0370918	0.0535772	-0.0270918	0.0635772
M06-2X-D3
benzyl methyl sulfide	1.86	1.88	1.87082	1.89916	0.0108167	0.0391558	-0.00918329	0.0191558
2-hydroxyethyl benzyl sulfide	1.98	1.84	1.87015	1.8936	-0.109847	-0.086401	0.0301525	0.053599
thioanisole	1.64	1.63	1.60291	1.69352	-0.037095	0.0535212	-0.027095	0.0635212
wB97X
benzyl methyl sulfide	1.86	1.88	1.83947	1.9709	-0.0205264	0.110899	-0.0405264	0.0908987
2-hydroxyethyl benzyl sulfide	1.98	1.84	1.83349	1.96122	-0.146514	-0.0187782	-0.00651376	0.121222
thioanisole	1.64	1.63	1.48489	1.69473	-0.155106	0.0547252	-0.145106	0.0647252
wB97X-D
benzyl methyl sulfide	1.86	1.88	1.74568	1.88465	-0.114318	0.0246485	-0.134318	0.00464852
2-hydroxyethyl benzyl sulfide	1.98	1.84	1.74216	1.88839	-0.237842	-0.0916147	-0.0978423	0.0483853
thioanisole	1.64	1.63	1.4506	1.69147	-0.189398	0.0514745	-0.179398	0.0614745
